# Supplementary material for: Refined methods for the synthesis of meso-substituted A3- and trans-A2B-corrolesElectronic supplementary information (ESI) available: table describing attempts to optimize the reaction of MesDPM 30 with aldehyde 11. See http://www.rsc.org/suppdata/ob/b2/b208950e/
Source: Royal Society of Chemistry journal article supplement (doi:10.1039/b208950e), 2002-12-09
Supplement: b208950e.pdf [file b208950e.pdf]

## Electronic Supplementary Information

**Table .** Optimization of conditions for the reaction of dipyrromethane **30** with aldehyde **11**<sup>a</sup>

| Entry           | TFA (mM)        | Time of acid catalyzed step | DPM <b>30</b> (mM) | DDQ (mmol)/ <b>30</b> (mmol) | X-fold dilution <sup>b</sup> | Yield of corrole <b>35</b> (%) <sup>c</sup> |
|-----------------|-----------------|-----------------------------|--------------------|------------------------------|------------------------------|---------------------------------------------|
| 1               | 3               | 5 h                         | 33                 | 1                            | -                            | 18                                          |
| 2               | 3               | 5 h                         | 33                 | 1                            | 27                           | 22                                          |
| 3               | 3               | 5 h                         | 33                 | 1.3                          | -                            | 24                                          |
| 4               | 3               | 5 h                         | 33                 | 1.3                          | 27                           | 28                                          |
| 5 <sup>d</sup>  | 3               | 5 h                         | 33                 | 1.3                          | 27                           | 27                                          |
| 6 <sup>e</sup>  | 3               | 5 h                         | 33                 | 1.3                          | 27                           | 27                                          |
| 7               | 1.3             | 5 h                         | 133                | 1.3                          | 27                           | 28                                          |
| 8               | 4.3             | 3 h                         | 133                | 1.3                          | -                            | 26                                          |
| 9               | 13              | 3 h                         | 133                | 1.3                          | -                            | 26                                          |
| 10              | 13              | 20 min                      | 133                | 1.3                          | -                            | 29                                          |
| 11              | 13              | 10 min                      | 133                | 1.3                          | -                            | 29                                          |
| 12              | 1.3             | 5 h                         | 133                | 1.3                          | -                            | 23                                          |
| 13              | 13              | 5 h                         | 133 <sup>f</sup>   | 1.3                          | -                            | 19                                          |
| 14              | 13              | 10 min                      | 133                | 1.3                          | <sup>g</sup>                 | 26                                          |
| 15              | 1.3             | 5 h                         | 133                | 1.3                          | 13                           | 29                                          |
| 16              | 1.3             | 5 h                         | 133                | 1.3                          | 27 <sup>h</sup>              | 26                                          |
| 17              | 1.3             | 5 h                         | 133                | 1.3                          | <sup>g</sup>                 | 31                                          |
| 18 <sup>i</sup> | 1.3             | 16 h                        | 133                | 1.4                          | 27                           | 31                                          |
| 19              | 18              | 1 min                       | 40                 | 1.5                          | -                            | 8                                           |
| 20              | 18              | 3 min                       | 40                 | 1.5                          | -                            | 16                                          |
| 21              | 18              | 12 min                      | 40 <sup>j</sup>    | 1.5                          | -                            | 16                                          |
| 22              | 18 <sup>k</sup> | 3.5 min                     | 40                 | 1.3                          | 27                           | 24                                          |

<sup>a</sup> All reactions were performed under the following constant conditions: For 1<sup>st</sup> step: CH<sub>2</sub>Cl<sub>2</sub>, MesDPM:aldehyde **11** = 2:1, RT. For 2<sup>nd</sup> step: RT). <sup>b</sup> Where X indicates how many times the reaction mixture was diluted before addition of DDQ. <sup>c</sup> Isolated

yields. <sup>d</sup> THF was used in the 2<sup>nd</sup> step. <sup>e</sup> Toluene was used in the 2<sup>nd</sup> step. <sup>f</sup> MeCN was used in 2<sup>nd</sup> step <sup>g</sup> The reaction mixture dissolved in CH<sub>2</sub>Cl<sub>2</sub> and the solution of DDQ were added simultaneously to CH<sub>2</sub>Cl<sub>2</sub> during 10 min. <sup>h</sup> MeCN with NH<sub>4</sub>Cl was used in 2<sup>nd</sup> step. <sup>i</sup> Aldehyde **11** was added during 3 h. <sup>j</sup> Toluene was used as a solvent in both steps. <sup>k</sup> Aldehyde **11** was added during 3 min.
